# Supplementary material
Source: publisher figshare collection journal article supplement (https://karger.figshare.com/articles/dataset/_/24589605)
Supplement: Supplementary file 1 [file 1]

**Supplementary Table 1 Association Between FAR Measured in Different Stage and Stroke Outcomes Within 1 Year**

| Outcomes | <24h  (n=2562) | | 24h-72h  (n=3142) | | 72h-7d  (n=3042) | |
| --- | --- | --- | --- | --- | --- | --- |
| Unadjusted | Model | Unadjusted | Model | Unadjusted | Model |
| OR/HR (95%CI) | OR*/HR* (95%CI) | OR/HR (95%CI) | OR*/HR* (95%CI) | OR/HR (95%CI) | OR*/HR* (95%CI) |
| Poor Functional Outcomes |  |  |  |  |  |  |
| Q1 | Reference | Reference | Reference | Reference | Reference | Reference |
| Q2 | 1.51(1.01-2.26) | 1.21(0.77-1.89) | 1.21(0.87-1.69) | 1.20(0.82-1.75) | 1.22(0.87-1.73) | 1.00(0.69-1.44) |
| Q3 | 1.32(0.87-2.03) | 0.91(0.57-1.47) | 1.50(1.09-2.07) | 1.21(0.83-1.75) | 1.52(1.09-3.67) | 1.02(0.71-1.45) |
| Q4 | 2.14(1.43-3.18) | 1.39(1.02-1.83) | 3.04(2.25-4.12) | 1.75(1.23-2.50) | 2.71(1.99-3.67) | 1.36(1.02-1.62) |
| Disability |  |  |  |  |  |  |
| Q1 | Reference | Reference | Reference | Reference | Reference | Reference |
| Q2 | 1.70(1.07-2.71) | 1.42(0.85-2.35) | 1.19(0.82-1.73) | 1.20(0.79-1.83) | 1.31(0.89-1.93) | 1.08(0.71-1.63) |
| Q3 | 1.44(0.89-2.35) | 1.02(0.60-1.74) | 1.57(1.09-2.25) | 1.30(0.86-1.95) | 1.59(1.10-2.32) | 1.10(0.74-1.64) |
| Q4 | 1.90(1.18-3.06) | 1.25(1.02-1.51) | 2.89(2.05-4.06) | 1.78(1.16-2.51) | 2.78(1.97-3.93) | 1.43(1.02-1.87) |
| All-cause Death |  |  |  |  |  |  |
| Q1 | Reference | Reference | Reference | Reference | Reference | Reference |
| Q2 | 1.01(0.47-2.12) | 0.72(0.34-1.57) | 1.25(0.66-2.38) | 1.26(0.65-2.45) | 0.95(0.48-1.89) | 0.78(0.39-1.55) |
| Q3 | 1.01(0.47-2.19) | 0.65(0.29-1.42) | 1.24(0.65-2.38) | 1.09(0.56-2.11) | 1.27(0.67-2.39) | 0.88(0.46-1.66) |
| Q4 | 2.42(1.27-4.62) | 1.43(1.01-2.81) | 3.06(1.74-5.40) | 1.73(1.03-2.41) | 2.16(1.23-3.82) | 1.25(1.05-1.51) |
| Recurrent Stroke |  |  |  |  |  |  |
| Q1 | Reference | Reference | Reference | Reference | Reference | Reference |
| Q2 | 1.04(0.70-1.54) | 0.95(0.64-1.43) | 0.99(0.72-1.36) | 0.94(0.68-1.29) | 1.22(0.88-1.69) | 1.19(0.86-1.64) |
| Q3 | 0.82(0.53-1.25) | 0.74(0.48-1.15) | 0.97(0.71-1.34) | 0.89(0.64-1.24) | 1.07(0.77-1.49) | 0.99(0.71-1.38) |
| Q4 | 1.23(0.83-1.82) | 1.13(0.74-1.70) | 1.34(0.99-1.82) | 1.09(0.79-1.50) | 1.21(0.88-1.66) | 1.07(0.77-1.49) |
| Combined Vascular Events |  |  |  |  |  |  |
| Q1 | Reference | Reference | Reference | Reference | Reference | Reference |
| Q2 | 1.04(0.71-1.53) | 0.96(0.65-1.42) | 1.01(0.74-1.38) | 0.96(0.70-1.31) | 1.20(0.87-1.64) | 1.16(0.84-1.59) |
| Q3 | 0.87(0.58-1.32) | 0.79(0.52-1.22) | 1.08(0.79-1.47) | 0.98(0.72-1.35) | 1.05(0.76-1.46) | 0.95(0.68-1.32) |
| Q4 | 1.21(0.82-1.78) | 1.09(0.73-1.65) | 1.39(1.03-1.89) | 1.13(0.82-1.54) | 1.22(0.90-1.66) | 1.05(0.76-1.44) |

*Model was adjusted for age, sex, premorbid mRS, stroke, hypertension, coronary heart disease, dyslipidemia, diabetes mellitus, stroke subtype, cigarette smoking, alcohol consumption, history of medications: stain, antiplatelet **initial NIHSS, thrombolysis, thrombectomy**;

Abbreviations: CI, confidence interval; OR, odds ratio; HR, hazards ratio; Q, quartiles; FAR, fibrinogen-to-albumin ratio.
